# Supplementary material for: Influence of Fatigue on Tackling Ability in Rugby League Players: Role of Muscular Strength, Endurance, and Aerobic Qualities
Source: PubMed Central journal article supplement (PMC5087954; doi:10.1371/journal.pone.0163161), 2016-10-31
Supplement: pone.0163161.s001.pdf [file pone.0163161.s001.pdf]

| Subject 1                    | Cycle 1   | Cycle 2   | Cycle 3   | Cycle 4   | Total     |
|------------------------------|-----------|-----------|-----------|-----------|-----------|
| Contact in COG               | 1         | 1         | 1         | 1         | 4         |
| Contact with Shoulder        | 1         | 1         | 0         | 0         | 2         |
| Body position Square/Aligned | 1         | 1         | 0         | 0         | 2         |
| Leg Drive Upon Contact       | 0         | 0         | 1         | 0         | 1         |
| Watch Target onto Shoulder   | 1         | 1         | 0         | 0         | 2         |
| COG forward of base          | 1         | 1         | 1         | 1         | 4         |
| <b>Total</b>                 | <b>5</b>  | <b>5</b>  | <b>3</b>  | <b>2</b>  | <b>15</b> |
| <b>Total (%)</b>             | <b>83</b> | <b>83</b> | <b>50</b> | <b>33</b> | <b>63</b> |

| Subject 2                    | Cycle 1   | Cycle 2   | Cycle 3   | Cycle 4   | Total     |
|------------------------------|-----------|-----------|-----------|-----------|-----------|
| Contact in COG               | 0         | 0         | 0         | 0         | 0         |
| Contact with Shoulder        | 1         | 0         | 1         | 1         | 3         |
| Body position Square/Aligned | 1         | 1         | 1         | 1         | 4         |
| Leg Drive Upon Contact       | 0         | 1         | 1         | 1         | 3         |
| Watch Target onto Shoulder   | 1         | 0         | 1         | 0         | 2         |
| COG forward of base          | 1         | 1         | 1         | 1         | 4         |
| <b>Total</b>                 | <b>4</b>  | <b>3</b>  | <b>5</b>  | <b>4</b>  | <b>16</b> |
| <b>Total (%)</b>             | <b>67</b> | <b>50</b> | <b>83</b> | <b>67</b> | <b>67</b> |

| Subject 3                    | Cycle 1   | Cycle 2   | Cycle 3   | Cycle 4   | Total     |
|------------------------------|-----------|-----------|-----------|-----------|-----------|
| Contact in COG               | 1         | 1         | 1         | 0         | 3         |
| Contact with Shoulder        | 1         | 0         | 1         | 1         | 3         |
| Body position Square/Aligned | 0         | 0         | 0         | 0         | 0         |
| Leg Drive Upon Contact       | 1         | 1         | 1         | 0         | 3         |
| Watch Target onto Shoulder   | 1         | 0         | 1         | 1         | 3         |
| COG forward of base          | 1         | 1         | 1         | 0         | 3         |
| <b>Total</b>                 | <b>5</b>  | <b>3</b>  | <b>5</b>  | <b>2</b>  | <b>15</b> |
| <b>Total (%)</b>             | <b>83</b> | <b>50</b> | <b>83</b> | <b>33</b> | <b>63</b> |

| Subject 4                    | Cycle 1    | Cycle 2    | Cycle 3    | Cycle 4    | Total      |
|------------------------------|------------|------------|------------|------------|------------|
| Contact in COG               | 1          | 1          | 1          | 1          | 4          |
| Contact with Shoulder        | 1          | 1          | 1          | 1          | 4          |
| Body position Square/Aligned | 1          | 1          | 1          | 1          | 4          |
| Leg Drive Upon Contact       | 1          | 1          | 1          | 1          | 4          |
| Watch Target onto Shoulder   | 1          | 1          | 1          | 1          | 4          |
| COG forward of base          | 1          | 1          | 1          | 1          | 4          |
| <b>Total</b>                 | <b>6</b>   | <b>6</b>   | <b>6</b>   | <b>6</b>   | <b>24</b>  |
| <b>Total (%)</b>             | <b>100</b> | <b>100</b> | <b>100</b> | <b>100</b> | <b>100</b> |

| Subject 5                    | Cycle 1   | Cycle 2   | Cycle 3   | Cycle 4   | Total     |
|------------------------------|-----------|-----------|-----------|-----------|-----------|
| Contact in COG               | 0         | 1         | 0         | 0         | 1         |
| Contact with Shoulder        | 1         | 1         | 1         | 1         | 4         |
| Body position Square/Aligned | 1         | 1         | 1         | 0         | 3         |
| Leg Drive Upon Contact       | 1         | 0         | 0         | 1         | 2         |
| Watch Target onto Shoulder   | 1         | 1         | 1         | 0         | 3         |
| COG forward of base          | 1         | 1         | 1         | 0         | 3         |
| <b>Total</b>                 | <b>5</b>  | <b>5</b>  | <b>4</b>  | <b>2</b>  | <b>16</b> |
| <b>Total (%)</b>             | <b>83</b> | <b>83</b> | <b>67</b> | <b>33</b> | <b>67</b> |

| Subject 6                    | Cycle 1   | Cycle 2   | Cycle 3   | Cycle 4   | Total |
|------------------------------|-----------|-----------|-----------|-----------|-------|
| Contact in COG               | 1         | 1         | 1         | 1         | 4     |
| Contact with Shoulder        | 1         | 1         | 1         | 1         | 4     |
| Body position Square/Aligned | 0         | 1         | 0         | 0         | 1     |
| Leg Drive Upon Contact       | 1         | 0         | 1         | 0         | 2     |
| Watch Target onto Shoulder   | 0         | 0         | 0         | 0         | 0     |
| COG forward of base          | 1         | 1         | 1         | 1         | 4     |
| <b>Total</b>                 | <b>4</b>  | <b>4</b>  | <b>4</b>  | <b>3</b>  | 15    |
| <b>Total (%)</b>             | <b>67</b> | <b>67</b> | <b>67</b> | <b>50</b> | 63    |

| Subject 7                    | Cycle 1   | Cycle 2   | Cycle 3   | Cycle 4   | Total |
|------------------------------|-----------|-----------|-----------|-----------|-------|
| Contact in COG               | 1         | 1         | 1         | 1         | 4     |
| Contact with Shoulder        | 1         | 1         | 1         | 1         | 4     |
| Body position Square/Aligned | 1         | 1         | 1         | 0         | 3     |
| Leg Drive Upon Contact       | 0         | 0         | 0         | 0         | 0     |
| Watch Target onto Shoulder   | 1         | 1         | 1         | 1         | 4     |
| COG forward of base          | 1         | 0         | 0         | 1         | 2     |
| <b>Total</b>                 | <b>5</b>  | <b>4</b>  | <b>4</b>  | <b>4</b>  | 17    |
| <b>Total (%)</b>             | <b>83</b> | <b>67</b> | <b>67</b> | <b>67</b> | 71    |

| Subject 8                    | Cycle 1   | Cycle 2   | Cycle 3   | Cycle 4   | Total |
|------------------------------|-----------|-----------|-----------|-----------|-------|
| Contact in COG               | 0         | 0         | 0         | 0         | 0     |
| Contact with Shoulder        | 1         | 1         | 1         | 1         | 4     |
| Body position Square/Aligned | 0         | 0         | 0         | 0         | 0     |
| Leg Drive Upon Contact       | 1         | 0         | 0         | 0         | 1     |
| Watch Target onto Shoulder   | 0         | 1         | 1         | 1         | 3     |
| COG forward of base          | 1         | 1         | 0         | 1         | 3     |
| <b>Total</b>                 | <b>3</b>  | <b>3</b>  | <b>2</b>  | <b>3</b>  | 11    |
| <b>Total (%)</b>             | <b>50</b> | <b>50</b> | <b>33</b> | <b>50</b> | 46    |

| Subject 9                    | Cycle 1    | Cycle 2    | Cycle 3   | Cycle 4   | Total |
|------------------------------|------------|------------|-----------|-----------|-------|
| Contact in COG               | 1          | 1          | 0         | 1         | 3     |
| Contact with Shoulder        | 1          | 1          | 1         | 1         | 4     |
| Body position Square/Aligned | 1          | 1          | 0         | 1         | 3     |
| Leg Drive Upon Contact       | 1          | 1          | 1         | 0         | 3     |
| Watch Target onto Shoulder   | 1          | 1          | 1         | 0         | 3     |
| COG forward of base          | 1          | 1          | 1         | 1         | 4     |
| <b>Total</b>                 | <b>6</b>   | <b>6</b>   | <b>4</b>  | <b>4</b>  | 20    |
| <b>Total (%)</b>             | <b>100</b> | <b>100</b> | <b>67</b> | <b>67</b> | 83    |

| Subject 10                   | Cycle 1    | Cycle 2   | Cycle 3   | Cycle 4   | Total |
|------------------------------|------------|-----------|-----------|-----------|-------|
| Contact in COG               | 1          | 1         | 1         | 1         | 4     |
| Contact with Shoulder        | 1          | 1         | 1         | 1         | 4     |
| Body position Square/Aligned | 1          | 1         | 1         | 1         | 4     |
| Leg Drive Upon Contact       | 1          | 0         | 0         | 0         | 1     |
| Watch Target onto Shoulder   | 1          | 1         | 1         | 0         | 3     |
| COG forward of base          | 1          | 1         | 1         | 0         | 3     |
| <b>Total</b>                 | <b>6</b>   | <b>5</b>  | <b>5</b>  | <b>3</b>  | 19    |
| <b>Total (%)</b>             | <b>100</b> | <b>83</b> | <b>83</b> | <b>50</b> | 79    |

| Subject 11                   | Cycle 1   | Cycle 2   | Cycle 3   | Cycle 4   | Total     |
|------------------------------|-----------|-----------|-----------|-----------|-----------|
| Contact in COG               | 1         | 1         | 1         | 1         | 4         |
| Contact with Shoulder        | 1         | 1         | 1         | 1         | 4         |
| Body position Square/Aligned | 1         | 1         | 1         | 0         | 3         |
| Leg Drive Upon Contact       | 0         | 0         | 0         | 0         | 0         |
| Watch Target onto Shoulder   | 1         | 1         | 1         | 1         | 4         |
| COG forward of base          | 1         | 1         | 1         | 1         | 4         |
| <b>Total</b>                 | <b>5</b>  | <b>5</b>  | <b>5</b>  | <b>4</b>  | <b>19</b> |
| <b>Total (%)</b>             | <b>83</b> | <b>83</b> | <b>83</b> | <b>67</b> | <b>79</b> |

| Subject 1                    | Cycle 1   | Cycle 2   | Cycle 3   | Cycle 4   | Total     |
|------------------------------|-----------|-----------|-----------|-----------|-----------|
| Contact in COG               | 100%      | 100%      | 100%      | 100%      | 4         |
| Contact with Shoulder        | 100%      | 100%      | 0%        | 0%        | 2         |
| Body position Square/Aligned | 100%      | 100%      | 0%        | 0%        | 2         |
| Leg Drive Upon Contact       | 0%        | 0%        | 100%      | 0%        | 1         |
| Watch Target onto Shoulder   | 100%      | 100%      | 0%        | 0%        | 2         |
| COG forward of base          | 100%      | 100%      | 100%      | 100%      | 4         |
| <b>Total</b>                 | <b>5</b>  | <b>5</b>  | <b>3</b>  | <b>2</b>  | <b>15</b> |
| <b>Total (%)</b>             | <b>83</b> | <b>83</b> | <b>50</b> | <b>33</b> | <b>63</b> |

| Subject 2                    | Cycle 1   | Cycle 2   | Cycle 3   | Cycle 4   | Total     |
|------------------------------|-----------|-----------|-----------|-----------|-----------|
| Contact in COG               | 0.0%      | 0.0%      | 0.0%      | 0.0%      | 0         |
| Contact with Shoulder        | 100.0%    | 0.0%      | 100.0%    | 100.0%    | 3         |
| Body position Square/Aligned | 100.0%    | 100.0%    | 100.0%    | 100.0%    | 4         |
| Leg Drive Upon Contact       | 0.0%      | 100.0%    | 100.0%    | 100.0%    | 3         |
| Watch Target onto Shoulder   | 100.0%    | 0.0%      | 100.0%    | 0.0%      | 2         |
| COG forward of base          | 100.0%    | 100.0%    | 100.0%    | 100.0%    | 4         |
| <b>Total</b>                 | <b>4</b>  | <b>3</b>  | <b>5</b>  | <b>4</b>  | <b>16</b> |
| <b>Total (%)</b>             | <b>67</b> | <b>50</b> | <b>83</b> | <b>67</b> | <b>67</b> |

| Subject 3                    | Cycle 1   | Cycle 2   | Cycle 3   | Cycle 4   | Total     |
|------------------------------|-----------|-----------|-----------|-----------|-----------|
| Contact in COG               | 100.0%    | 100.0%    | 100.0%    | 0.0%      | 3         |
| Contact with Shoulder        | 100.0%    | 0.0%      | 100.0%    | 100.0%    | 3         |
| Body position Square/Aligned | 0.0%      | 0.0%      | 0.0%      | 0.0%      | 0         |
| Leg Drive Upon Contact       | 100.0%    | 100.0%    | 100.0%    | 0.0%      | 3         |
| Watch Target onto Shoulder   | 100.0%    | 0.0%      | 100.0%    | 100.0%    | 3         |
| COG forward of base          | 100.0%    | 100.0%    | 100.0%    | 0.0%      | 3         |
| <b>Total</b>                 | <b>5</b>  | <b>3</b>  | <b>5</b>  | <b>2</b>  | <b>15</b> |
| <b>Total (%)</b>             | <b>83</b> | <b>50</b> | <b>83</b> | <b>33</b> | <b>63</b> |

| Subject 4                    | Cycle 1    | Cycle 2    | Cycle 3    | Cycle 4    | Total      |
|------------------------------|------------|------------|------------|------------|------------|
| Contact in COG               | 100.0%     | 100.0%     | 100.0%     | 100.0%     | 4          |
| Contact with Shoulder        | 100.0%     | 100.0%     | 100.0%     | 100.0%     | 4          |
| Body position Square/Aligned | 100.0%     | 100.0%     | 100.0%     | 100.0%     | 4          |
| Leg Drive Upon Contact       | 100.0%     | 100.0%     | 100.0%     | 100.0%     | 4          |
| Watch Target onto Shoulder   | 100.0%     | 100.0%     | 100.0%     | 100.0%     | 4          |
| COG forward of base          | 100.0%     | 100.0%     | 100.0%     | 100.0%     | 4          |
| <b>Total</b>                 | <b>6</b>   | <b>6</b>   | <b>6</b>   | <b>6</b>   | <b>24</b>  |
| <b>Total (%)</b>             | <b>100</b> | <b>100</b> | <b>100</b> | <b>100</b> | <b>100</b> |

| Subject 5                    | Cycle 1   | Cycle 2   | Cycle 3   | Cycle 4   | Total     |
|------------------------------|-----------|-----------|-----------|-----------|-----------|
| Contact in COG               | 0.0%      | 100.0%    | 0.0%      | 0.0%      | 1         |
| Contact with Shoulder        | 100.0%    | 100.0%    | 100.0%    | 100.0%    | 4         |
| Body position Square/Aligned | 100.0%    | 100.0%    | 100.0%    | 0.0%      | 3         |
| Leg Drive Upon Contact       | 100.0%    | 0.0%      | 0.0%      | 100.0%    | 2         |
| Watch Target onto Shoulder   | 100.0%    | 100.0%    | 100.0%    | 0.0%      | 3         |
| COG forward of base          | 100.0%    | 100.0%    | 100.0%    | 0.0%      | 3         |
| <b>Total</b>                 | <b>5</b>  | <b>5</b>  | <b>4</b>  | <b>2</b>  | <b>16</b> |
| <b>Total (%)</b>             | <b>83</b> | <b>83</b> | <b>67</b> | <b>33</b> | <b>67</b> |

| Subject 6                    | Cycle 1   | Cycle 2   | Cycle 3   | Cycle 4   | Total     |
|------------------------------|-----------|-----------|-----------|-----------|-----------|
| Contact in COG               | 100.0%    | 100.0%    | 100.0%    | 100.0%    | 4         |
| Contact with Shoulder        | 100.0%    | 100.0%    | 100.0%    | 100.0%    | 4         |
| Body position Square/Aligned | 0.0%      | 100.0%    | 0.0%      | 0.0%      | 1         |
| Leg Drive Upon Contact       | 100.0%    | 0.0%      | 100.0%    | 0.0%      | 2         |
| Watch Target onto Shoulder   | 0.0%      | 0.0%      | 0.0%      | 0.0%      | 0         |
| COG forward of base          | 100.0%    | 100.0%    | 100.0%    | 100.0%    | 4         |
| <b>Total</b>                 | <b>4</b>  | <b>4</b>  | <b>4</b>  | <b>3</b>  | <b>15</b> |
| <b>Total (%)</b>             | <b>67</b> | <b>67</b> | <b>67</b> | <b>50</b> | <b>63</b> |

| Subject 7                    | Cycle 1   | Cycle 2   | Cycle 3   | Cycle 4   | Total     |
|------------------------------|-----------|-----------|-----------|-----------|-----------|
| Contact in COG               | 100.0%    | 100.0%    | 100.0%    | 100.0%    | 4         |
| Contact with Shoulder        | 100.0%    | 100.0%    | 100.0%    | 100.0%    | 4         |
| Body position Square/Aligned | 100.0%    | 100.0%    | 100.0%    | 0.0%      | 3         |
| Leg Drive Upon Contact       | 0.0%      | 0.0%      | 0.0%      | 0.0%      | 0         |
| Watch Target onto Shoulder   | 100.0%    | 100.0%    | 100.0%    | 100.0%    | 4         |
| COG forward of base          | 100.0%    | 0.0%      | 0.0%      | 100.0%    | 2         |
| <b>Total</b>                 | <b>5</b>  | <b>4</b>  | <b>4</b>  | <b>4</b>  | <b>17</b> |
| <b>Total (%)</b>             | <b>83</b> | <b>67</b> | <b>67</b> | <b>67</b> | <b>71</b> |

| Subject 8                    | Cycle 1   | Cycle 2   | Cycle 3   | Cycle 4   | Total     |
|------------------------------|-----------|-----------|-----------|-----------|-----------|
| Contact in COG               | 0.0%      | 0.0%      | 0.0%      | 0.0%      | 0         |
| Contact with Shoulder        | 100.0%    | 100.0%    | 100.0%    | 100.0%    | 4         |
| Body position Square/Aligned | 0.0%      | 0.0%      | 0.0%      | 0.0%      | 0         |
| Leg Drive Upon Contact       | 100.0%    | 0.0%      | 0.0%      | 0.0%      | 1         |
| Watch Target onto Shoulder   | 0.0%      | 100.0%    | 100.0%    | 100.0%    | 3         |
| COG forward of base          | 100.0%    | 100.0%    | 0.0%      | 100.0%    | 3         |
| <b>Total</b>                 | <b>3</b>  | <b>3</b>  | <b>2</b>  | <b>3</b>  | <b>11</b> |
| <b>Total (%)</b>             | <b>50</b> | <b>50</b> | <b>33</b> | <b>50</b> | <b>46</b> |

| Subject 9                    | Cycle 1    | Cycle 2    | Cycle 3   | Cycle 4   | Total     |
|------------------------------|------------|------------|-----------|-----------|-----------|
| Contact in COG               | 100.0%     | 100.0%     | 0.0%      | 100.0%    | 3         |
| Contact with Shoulder        | 100.0%     | 100.0%     | 100.0%    | 100.0%    | 4         |
| Body position Square/Aligned | 100.0%     | 100.0%     | 0.0%      | 100.0%    | 3         |
| Leg Drive Upon Contact       | 100.0%     | 100.0%     | 100.0%    | 0.0%      | 3         |
| Watch Target onto Shoulder   | 100.0%     | 100.0%     | 100.0%    | 0.0%      | 3         |
| COG forward of base          | 100.0%     | 100.0%     | 100.0%    | 100.0%    | 4         |
| <b>Total</b>                 | <b>6</b>   | <b>6</b>   | <b>4</b>  | <b>4</b>  | <b>20</b> |
| <b>Total (%)</b>             | <b>100</b> | <b>100</b> | <b>67</b> | <b>67</b> | <b>83</b> |

| Subject 10                   | Cycle 1    | Cycle 2   | Cycle 3   | Cycle 4   | Total     |
|------------------------------|------------|-----------|-----------|-----------|-----------|
| Contact in COG               | 100.0%     | 100.0%    | 100.0%    | 100.0%    | 4         |
| Contact with Shoulder        | 100.0%     | 100.0%    | 100.0%    | 100.0%    | 4         |
| Body position Square/Aligned | 100.0%     | 100.0%    | 100.0%    | 100.0%    | 4         |
| Leg Drive Upon Contact       | 100.0%     | 0.0%      | 0.0%      | 0.0%      | 1         |
| Watch Target onto Shoulder   | 100.0%     | 100.0%    | 100.0%    | 0.0%      | 3         |
| COG forward of base          | 100.0%     | 100.0%    | 100.0%    | 0.0%      | 3         |
| <b>Total</b>                 | <b>6</b>   | <b>5</b>  | <b>5</b>  | <b>3</b>  | <b>19</b> |
| <b>Total (%)</b>             | <b>100</b> | <b>83</b> | <b>83</b> | <b>50</b> | <b>79</b> |

| Subject 11                   | Cycle 1   | Cycle 2   | Cycle 3   | Cycle 4   | Total     |
|------------------------------|-----------|-----------|-----------|-----------|-----------|
| Contact in COG               | 100.0%    | 100.0%    | 100.0%    | 100.0%    | 4         |
| Contact with Shoulder        | 100.0%    | 100.0%    | 100.0%    | 100.0%    | 4         |
| Body position Square/Aligned | 100.0%    | 100.0%    | 100.0%    | 0.0%      | 3         |
| Leg Drive Upon Contact       | 0.0%      | 0.0%      | 0.0%      | 0.0%      | 0         |
| Watch Target onto Shoulder   | 100.0%    | 100.0%    | 100.0%    | 100.0%    | 4         |
| COG forward of base          | 100.0%    | 100.0%    | 100.0%    | 100.0%    | 4         |
| <b>Total</b>                 | <b>5</b>  | <b>5</b>  | <b>5</b>  | <b>4</b>  | <b>19</b> |
| <b>Total (%)</b>             | <b>83</b> | <b>83</b> | <b>83</b> | <b>67</b> | <b>79</b> |
